# Supplementary figures and images for: Enhanced removal performance and evaluative interaction mechanism of europium from an aqueous medium by microbial yeast-decorated zeolitic imidazolate framework hybrids
Source: Royal Society of Chemistry journal article supplement (doi:10.1039/d2tc04655e), 2023-01-01

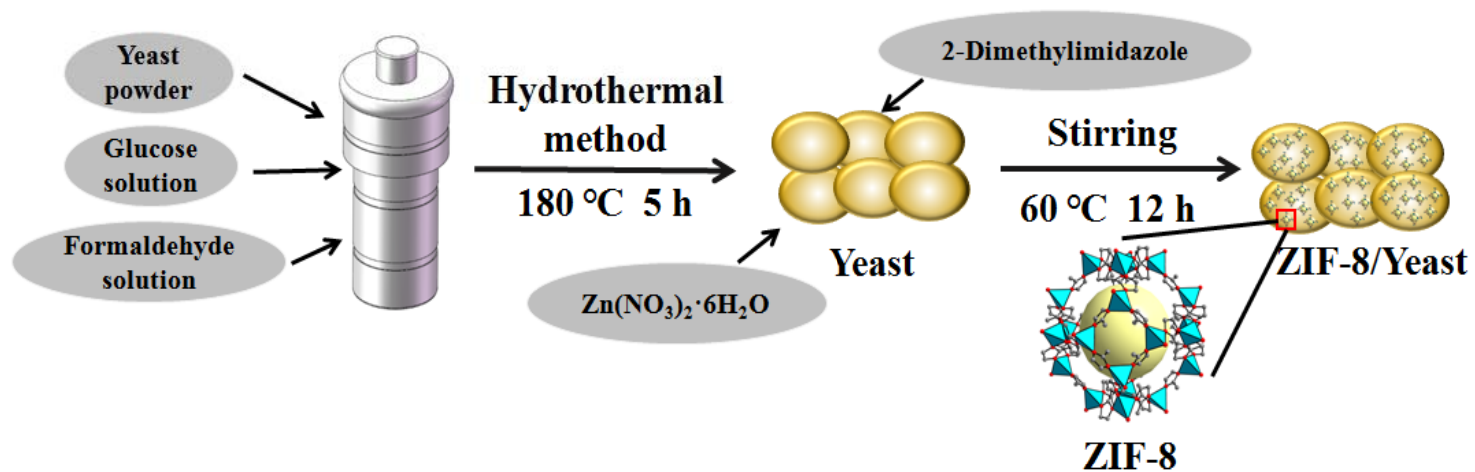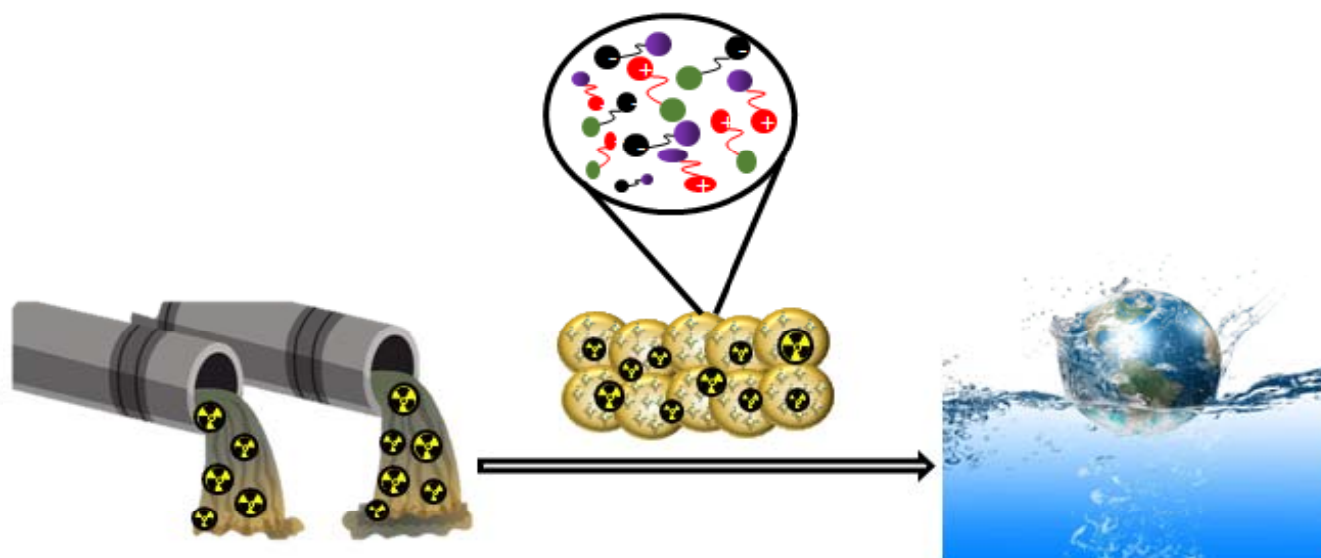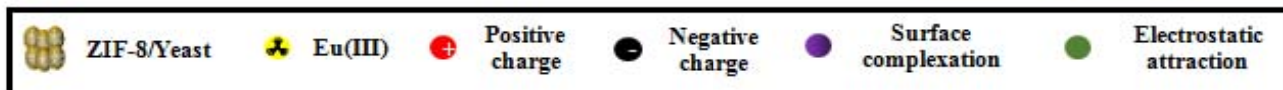

Supplement: d2tc04655e1.pdf [file d2tc04655e1.pdf]
